# Supplementary figures and images for: Signal regulatory protein alpha initiates cachexia through muscle to adipose tissue crosstalk
Source: PubMed Central journal article supplement — J Cachexia Sarcopenia Muscle. 2019 Sep 11;10(6):1210–27. doi: 10.1002/jcsm.12459 (PMC6903446; doi:10.1002/jcsm.12459), 2019-09-11

A

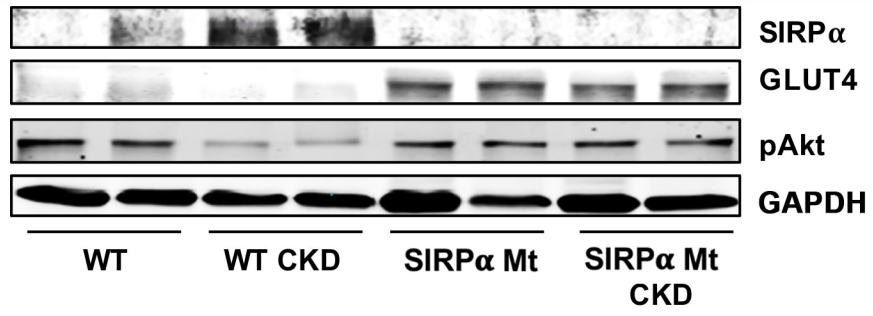

Supplement: JCSM-10-1210-s002.pdf [file JCSM-10-1210-s002.pdf]

**A**

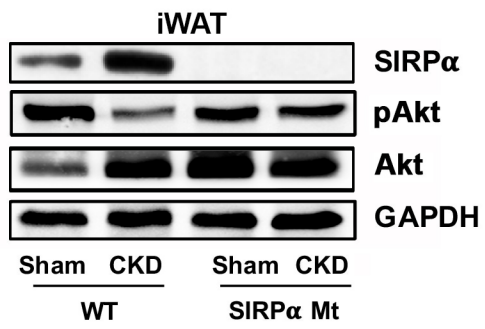

**B**

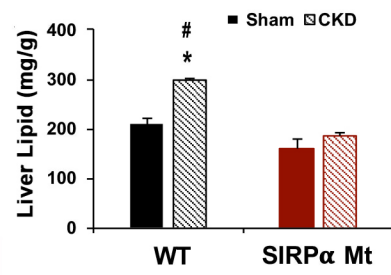

Supplement: JCSM-10-1210-s003.pdf [file JCSM-10-1210-s003.pdf]

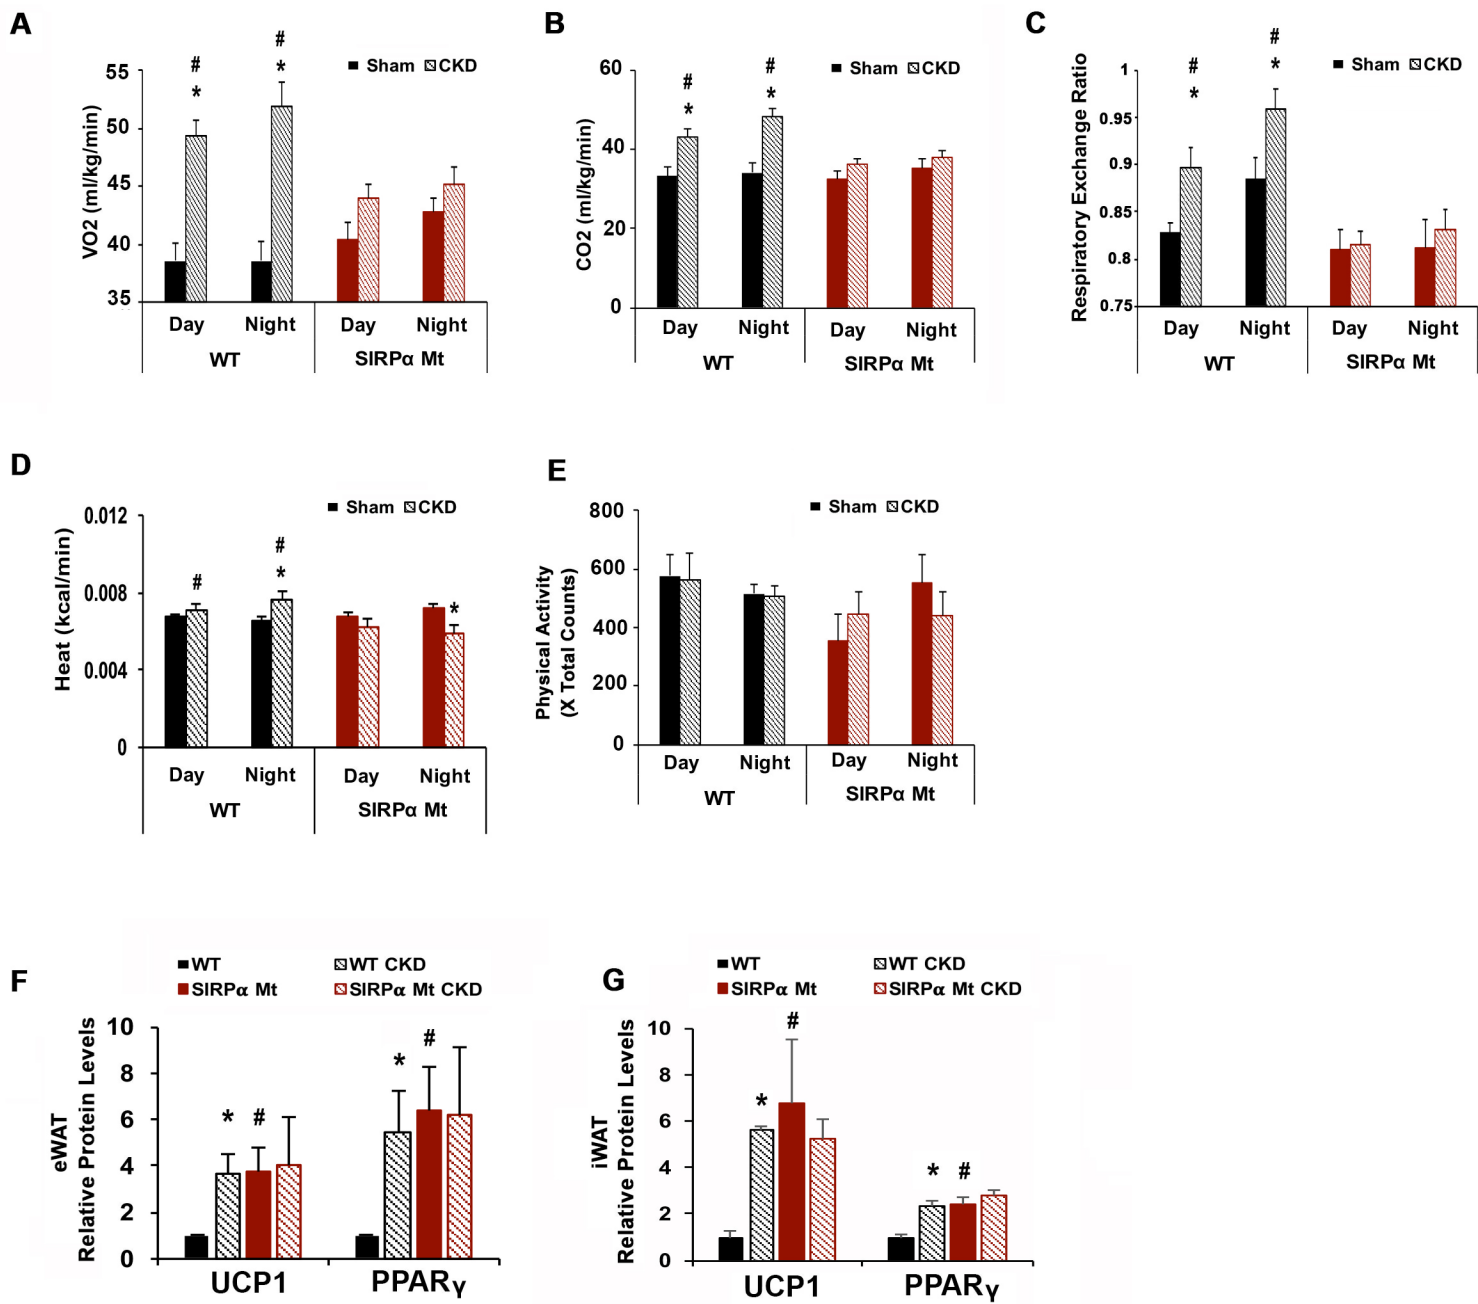

Supplement: JCSM-10-1210-s004.pdf [file JCSM-10-1210-s004.pdf]

**A**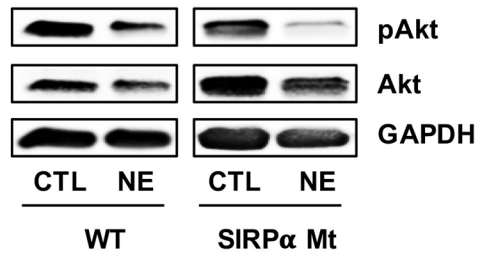**B**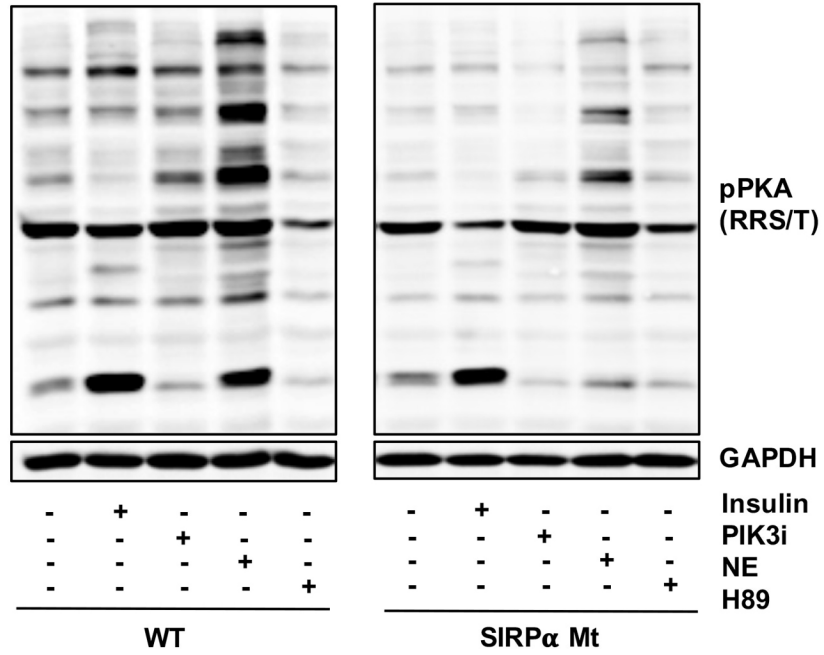**C**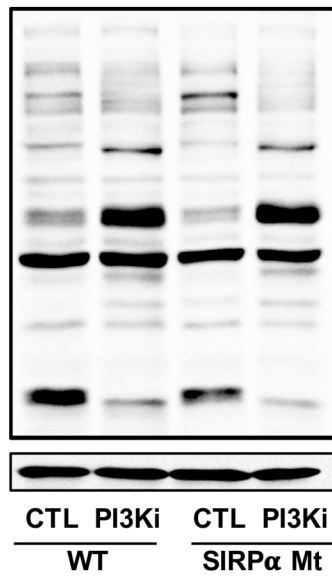**D**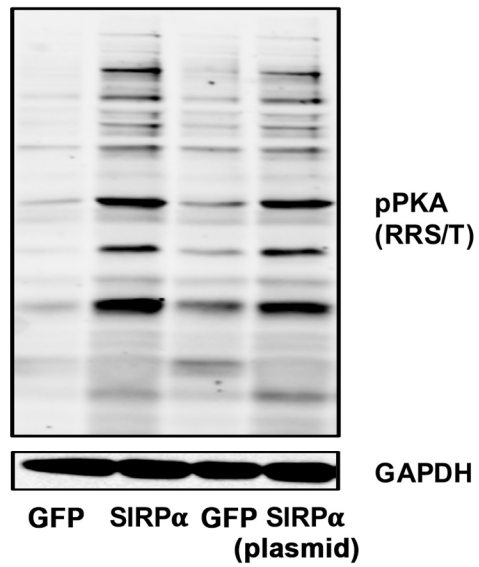

Supplement: JCSM-10-1210-s005.pdf [file JCSM-10-1210-s005.pdf]

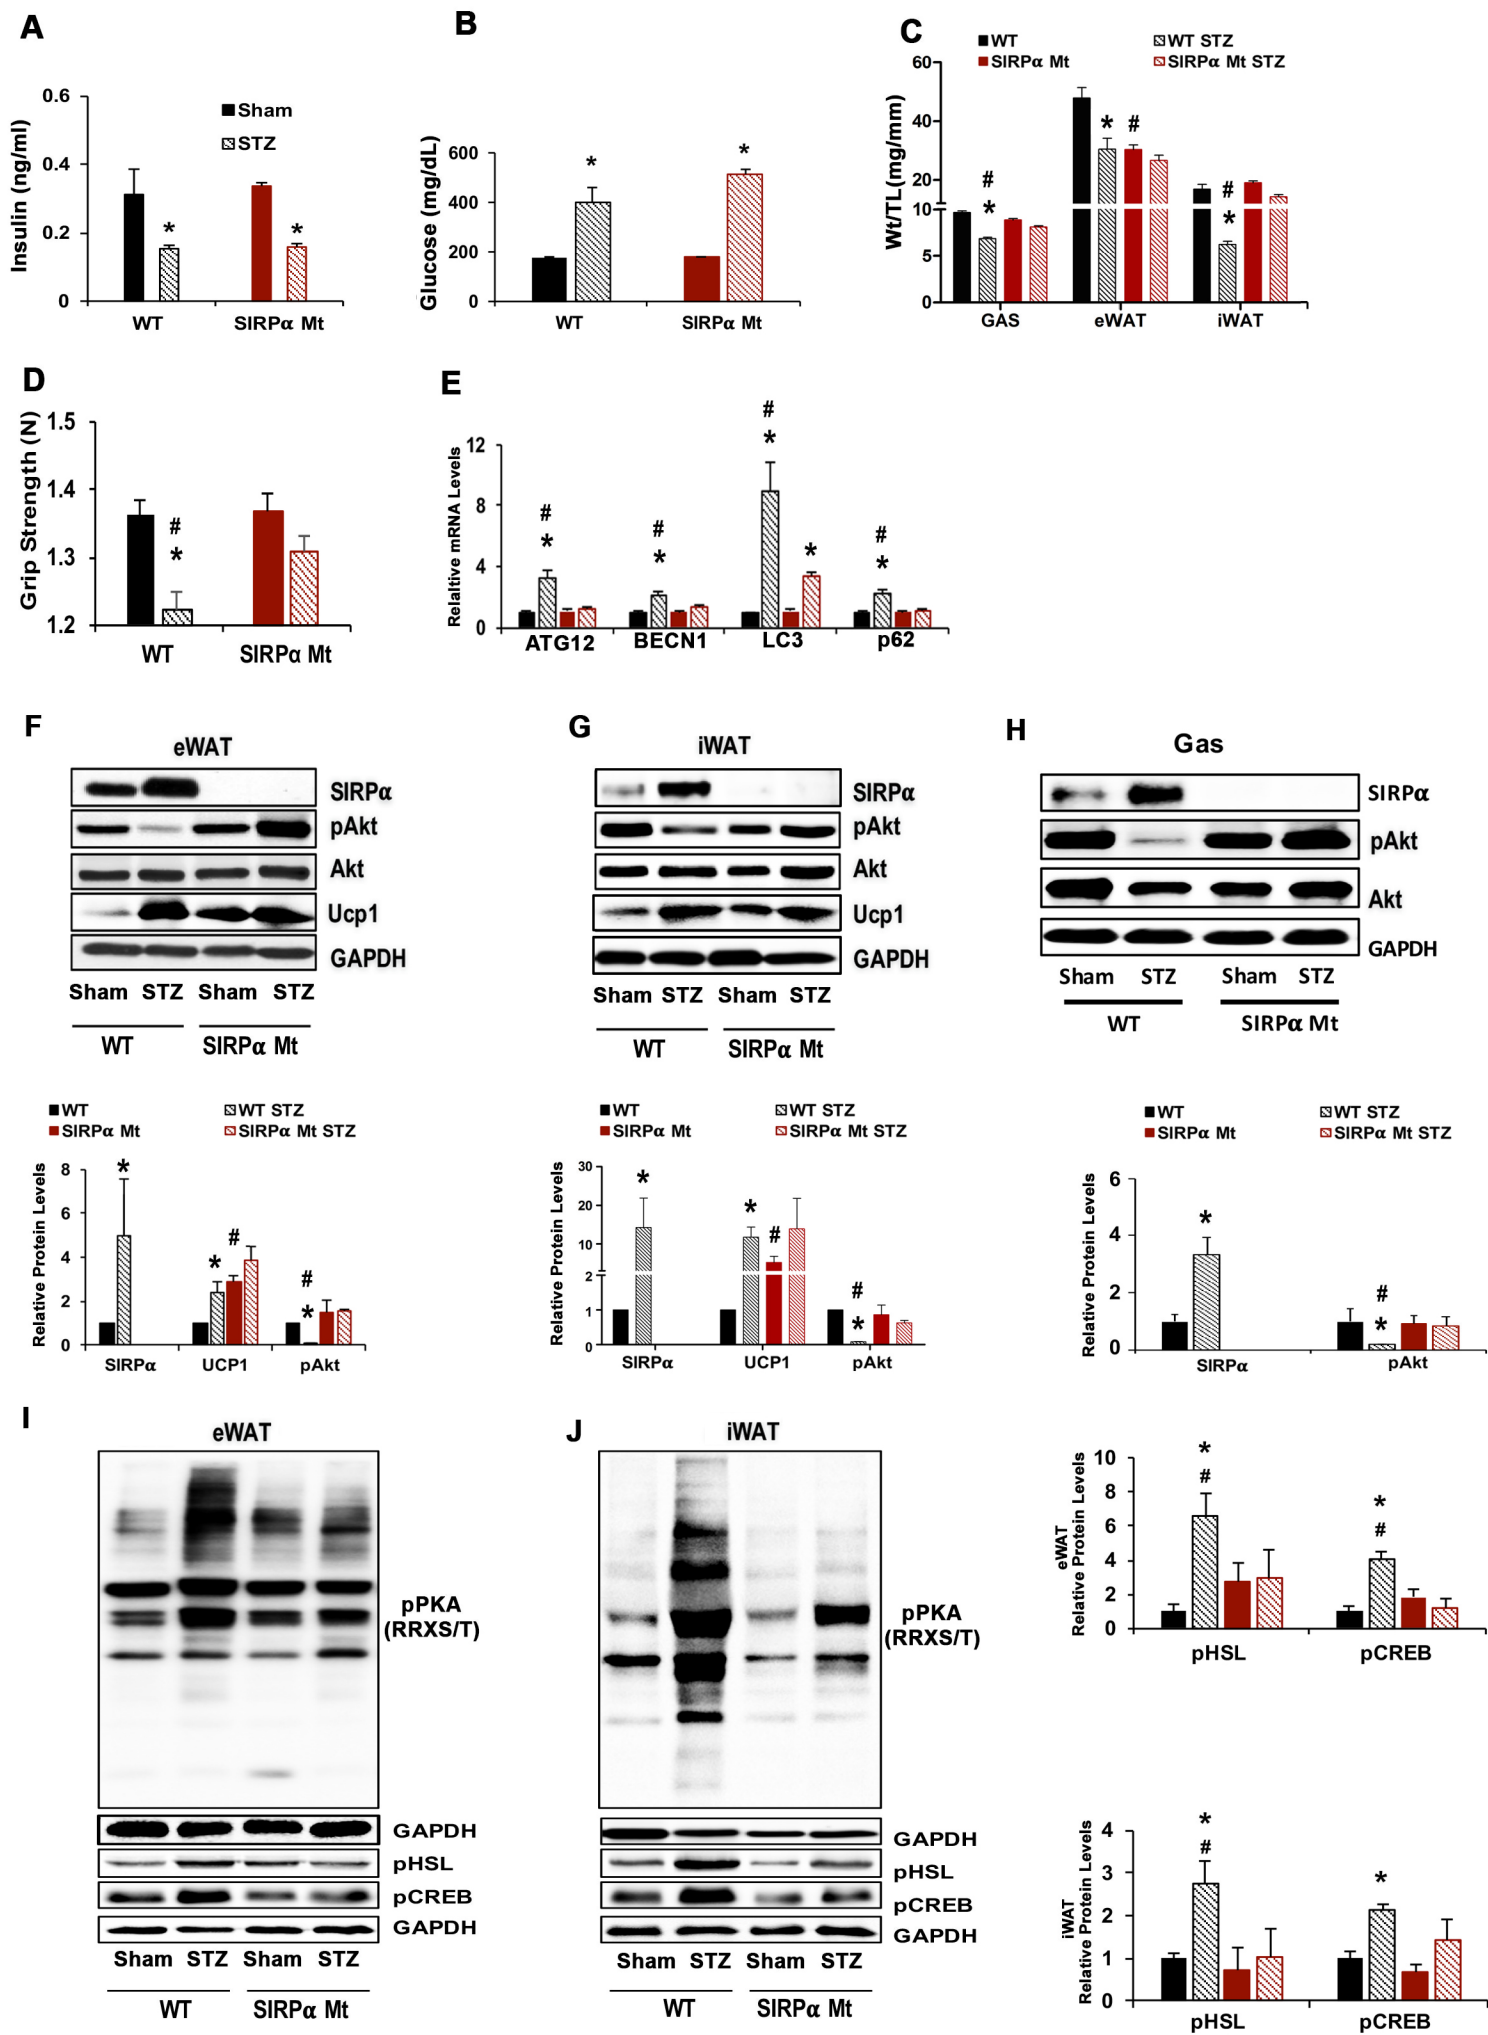

Supplement: JCSM-10-1210-s006.pdf [file JCSM-10-1210-s006.pdf]
